# Supplementary material for: Deficiency of the CD155-CD96 immune checkpoint controls IL-9 production in giant cell arteritis
Source: PubMed Central journal article supplement — Cell Rep Med. 2023 Apr 18;4(4):101012. doi: 10.1016/j.xcrm.2023.101012 (PMC10140609; doi:10.1016/j.xcrm.2023.101012), 2023-04-18
Supplement: mmc1.pdf [file mmc1.pdf]

**Cell Reports Medicine, Volume 4**

**Supplemental information**

**Deficiency of the CD155-CD96 immune checkpoint  
controls IL-9 production in giant cell arteritis**

**Shozo Ohtsuki, Chenyao Wang, Ryu Watanabe, Hui Zhang, Mitsuhiro Akiyama, Melanie C. Bois, Joseph J. Maleszewski, Kenneth J. Warrington, Gerald J. Berry, Jörg J. Goronzy, and Cornelia M. Weyand**

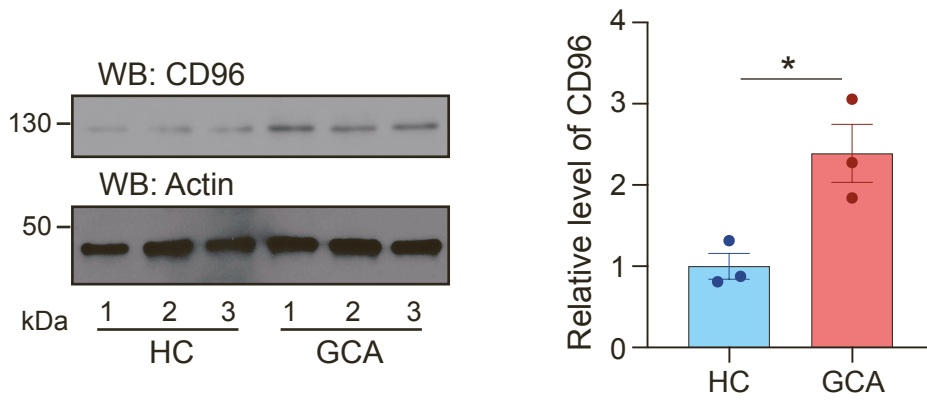

**Supplemental Figure S1. Accumulation of CD96<sup>high</sup> CD4<sup>+</sup> T cells in GCA patients.**

Immunoblotting of CD96 protein in control and patient-derived resting CD4<sup>+</sup> T cells. b-actin served as a control. Bar graph shows protein quantification. Data from 3 GCA patients and 3 healthy controls. Two-tailed unpaired t test. \* $<0.05$ .

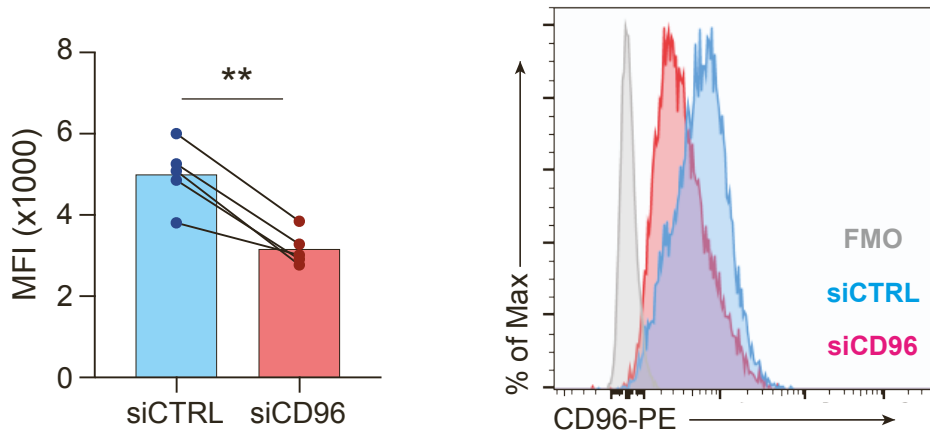

### Supplemental Figure S2. Knockdown efficiency for CD96.

CD96 was knocked down by transfecting CD4<sup>+</sup> T cells with CD96-specific or control siRNA. CD96 protein expression was quantified by FACS (n=5). Two-tailed paired t test. \*\*<0.01.

**A**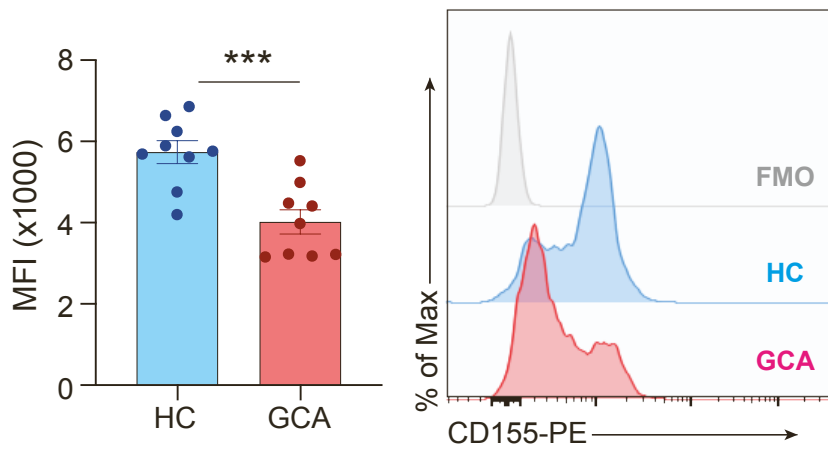**B**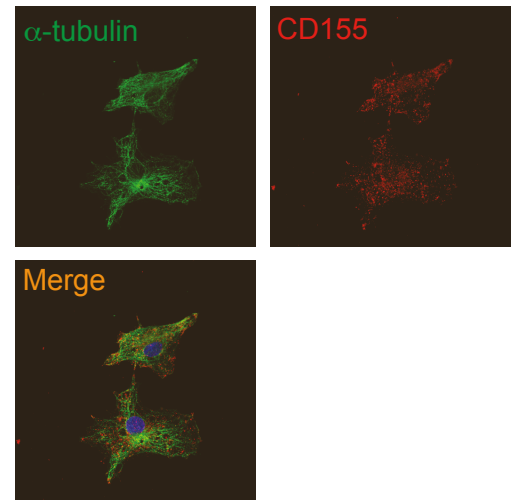

### Supplemental Figure S3. CD155 low-expressing monocytes in giant cell arteritis (GCA).

(A) Flow cytometric analysis of CD155 expression on CD14<sup>+</sup> monocytes from GCA patients and age-matched controls. Representative histograms and MFI are shown. Each dot represents one patient or one healthy individual.

(B) Monocyte-derived macrophages were induced from GCA patients and stained for CD155 (red) and  $\alpha$ -tubulin (green) as structure marker.

Two-tailed unpaired t test. \*\*\*<0.001

**A**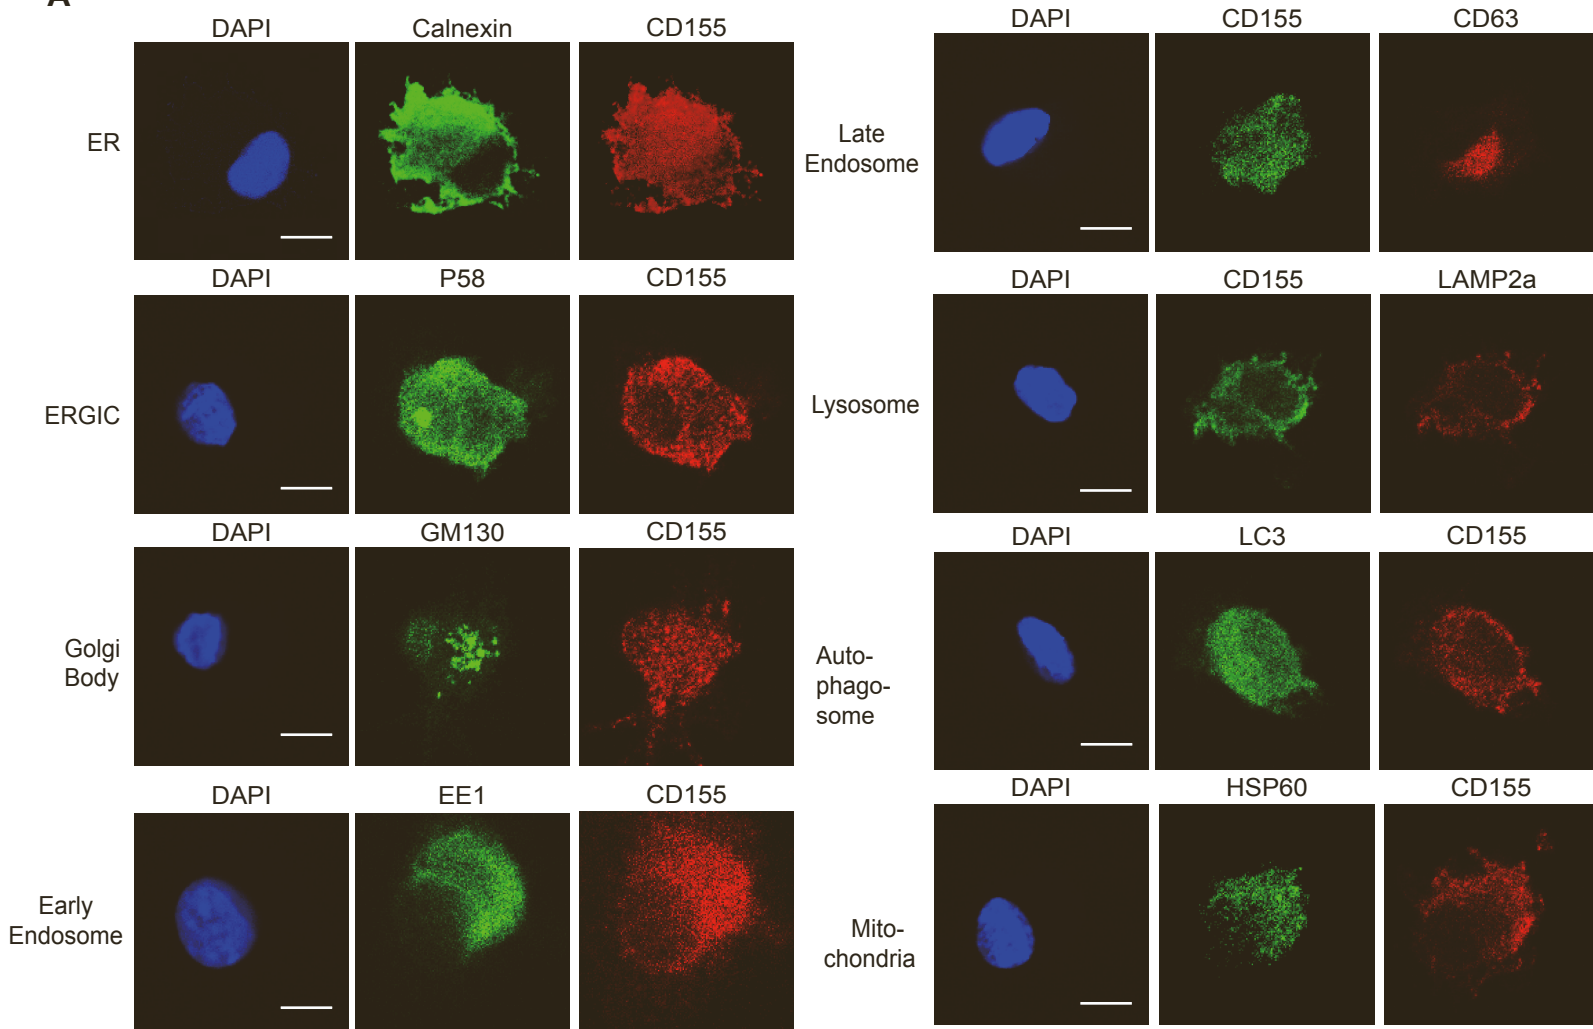**B**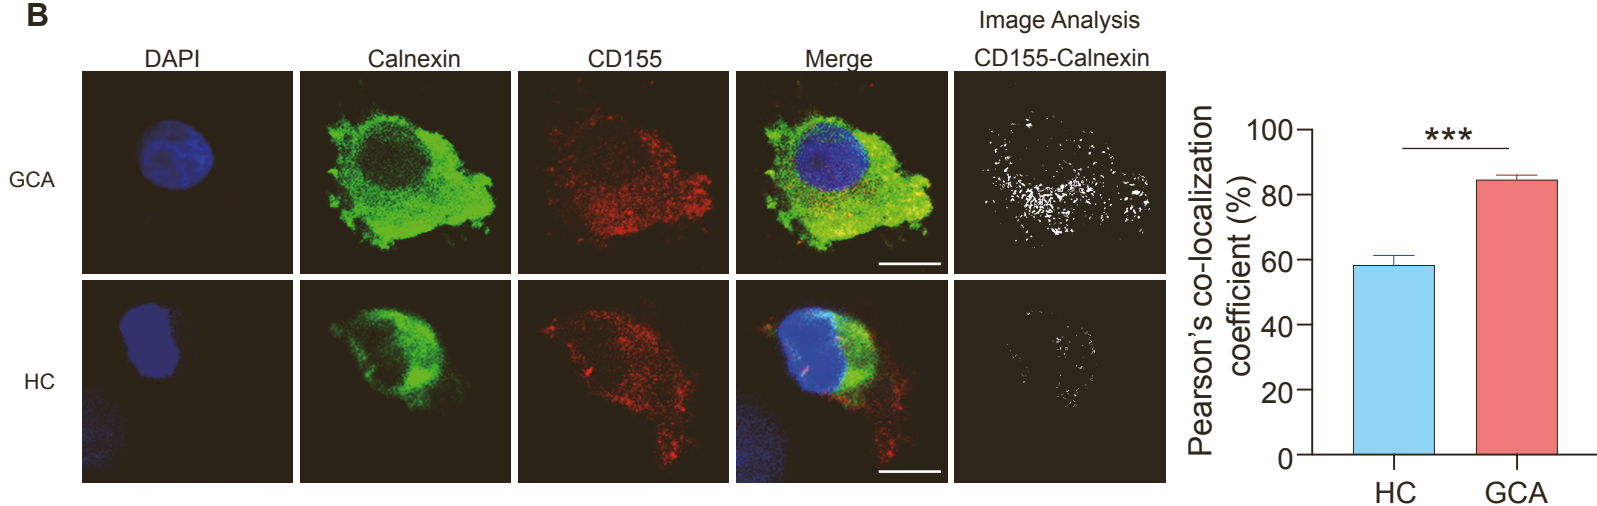

### Supplemental Figure S4. GCA macrophages under ER stress trap CD155 in the cytoplasm.

Monocyte-derived macrophages were generated from age-matched controls and GCA patients and stimulated with LPS/IFN- $\gamma$ .

(A) Macrophages were stained for CD155 and cellular organelles and imaged by fluorescence microscopy. Markers represent the following organelles: (Calnexin; ER), (P58; ERGIC), (GM130; Golgi body), (EE1; early endosome), (CD63; late endosome), (LAMP2a; lysosome), (LC3; autophagosome), (HSP60; mitochondria), (DAPI; nucleus).

(B) HC macrophages and GCA macrophages were stained for CD155 and Calnexin.

Cellular stains were analyzed by imaging software to reveal co-localization as white dots (right panel).

Scale bar; 5  $\mu$ m. Representative images for each subcellular organelle are shown.

**Supplemental Table 1. Clinical characteristics of patients with giant cell arteritis**

| <b>Parameters</b>                                                      | <b>Patients (n=144)</b> |
|------------------------------------------------------------------------|-------------------------|
| <b>Age (year, mean <math>\pm</math> SD)</b>                            | 73.60 $\pm$ 8.70        |
| <b>Female</b>                                                          | 101 (70.1%)             |
| <b>Ethnicity</b>                                                       |                         |
| Caucasian                                                              | 121 (84.0%)             |
| African American                                                       | 6 (4.2%)                |
| Hispanic                                                               | 8 (5.6%)                |
| Asian                                                                  | 6 (4.2%)                |
| Other                                                                  | 3 (2.1%)                |
| <b>Disease Duration (months, mean <math>\pm</math> SD)</b>             | 6.31 $\pm$ 7.86         |
| <b>Erythrocyte sedimentation rate (mean <math>\pm</math> SD, mm/h)</b> | 36.76 $\pm$ 27.81       |
| <b>C-reactive protein (mean <math>\pm</math> SD, mg/dL)</b>            | 7.94 $\pm$ 13.95        |
| <b>Headaches</b>                                                       | 70 (48.6%)              |
| <b>Eye involvement</b>                                                 | 50 (34.7%)              |
| <b>Aortic/large vessel involvement</b>                                 | 84 (58.3%)              |
| <b>Polymyalgia rheumatica</b>                                          | 92 (63.9%)              |
| <b>Treatment of GCA</b>                                                |                         |
| Untreated                                                              | 44 (30.6%)              |
| Prednisone (mg/day, mean $\pm$ SD)                                     | 5.17 $\pm$ 7.47         |
| Second immunosuppressant                                               | 37 (25.7%)              |

**Supplemental Table 2. PCR primers used in this study**

| <b>Genes</b>    | <b>Forward</b>              | <b>Reverse</b>            |
|-----------------|-----------------------------|---------------------------|
| $\beta$ -actin  | GATCATTGCTCCTCCTGAGC        | CGTCATACTCCTGCTTGCTG      |
| IL-1 $\beta$    | AAGTACTGAGCTCGCCAGTGAAA     | TTGCTGTAGTGGTGGTCGGAGATT  |
| IL-2            | AACTCCTGTCTTGCATTGCAC       | GCTCCAGTTGTAGCTGTGTTT     |
| IL-4            | TACAGCCACCATGAGAAGGACACT    | TTCCTGTGCGAGCCGTTTCAGGAAT |
| IL-5            | TGGAGCTGCCTACGTGTATG        | TTCGATGAGTAGAAAGCAGTGC    |
| IL-6            | AGCCACTCACCTCTTCAGAACGAA    | AGTGCCTCTTTGCTGCTTTACACAC |
| IL-9            | GGGATCCTGGACATCAACTTC       | GAAGCATGGTCTGGTGCAGTT     |
| IL-9            | CTCTGTTTGGGCATTCCCTCT       | GGGTATCTTGTTTGCATGGTGG    |
| IL-10           | TCCTTGCTGGAGGACTTTAAGGGT    | TGTCTGGGTCTTGTTCTCAGCTT   |
| IL-13           | CAACGCTCATTGCTCTCACTTGCC    | CCTTGTGCGGGCAGAATCCGCTCA  |
| IL-17A          | AACCGATCCACCTCACCTTGGAA     | TTCATGTGGTAGTCCACGTTCCCA  |
| IL-18           | TCTTCATTGACCAAGGAAATCGG     | TCCGGGGTGCATTATCTCTAC     |
| IL-21           | TCCTGGCAACATGGAGAGGATTGT    | AGCTGGCAGAAATTCAGGGACCAA  |
| IL-22           | CCTATATCACCAACCGCACCTTC     | AGATTGAGGGAAACAGCACTTCTTC |
| IL-9 receptor   | GCAACATCAGTTCTGGCCCAC       | TGCTTCCAGGCTCCCCGA        |
| IFN- $\gamma$   | ACTAGGCAGCCAACCTAAGCAAGA    | CATCAGGGTCACCTGACACATTCA  |
| TNF- $\alpha$   | GGTGGTGCCATCAGAGGGCC        | GAGCACATGGGTGGAGGGGC      |
| TNF- $\alpha$   | GGGACCTCTCTAATCAGCC         | GTTATCTCTCAGCTCCACGCC     |
| GM-CSF          | GGGAGCATGTGAATGCCATC        | GGCTCCTGGAGGTCAAACAT      |
| TGF- $\beta$    | ACTTGCACCACCTTGGACTTC       | GGTCATCACCGTTGGCTCA       |
| T cell receptor | CCTTCAACAACAGCATTATTATTCCAG | CGAGGGAGCACAGGCTGTCTTA    |
| CD80            | ATGGTGGGCACAGAAGTAGC        | AGGAAATCTGGGTTCTGGCG      |
| CD86            | TGGTCAGGGAGGGGTTTTGG        | GCCCCGGGTGATCTGTGTCT      |
| CD96            | CAAACACAGACAGTAGGCTTCTT     | GGGGATGATAGACAGCAATCAG    |
| CD155           | TGGAGGTGACGCATGTGTC         | GTTTGGACTCCGAATAGCTGG     |
| ATF4            | ATGACCGAAATGAGCTTCCTG       | GCTGGAGAACCCATGAGGT       |
| ATF6            | TCCTCGGTGAGTGGACTCTTA       | CTTGGGCTGAATTGAAGGTTTTG   |
| BiP             | GAAAGAAGGTTACCCATGCAGT      | CAGGCCATAAGCAATAGCAGC     |
| CHOP            | GGAAACAGAGTGGTCATTCCC       | CTGCTTGAGCCGTTTATTCTC     |
| TRIB3           | AAGCGGTTGGAGTTGGATGAC       | CACGATCTGGAGCAGTAGGTG     |
| XBP1            | CCCTCCAGAACATCTCCCAT        | ACATGACTGGGTCCAAGTTGT     |

**Supplemental Table 3. Antibodies used in this study**

| Antigen           | Conjugated      | Source                    | Catalog No |
|-------------------|-----------------|---------------------------|------------|
| Control mouse IgG | None            | BioLegend                 | 400124     |
| Control mouse IgG | None            | Thermo Fischer Scientific | 02-6502    |
| Mouse IgG         | Alexa Fluor 594 | Thermo Fisher Scientific  | A-11032    |
| Mouse IgG         | PE              | Thermo Fisher Scientific  | P-852      |
| Rabbit IgG        | FITC            | abcam                     | ab97050    |
| Rabbit IgG        | Alexa Fluor 488 | Thermo Fisher Scientific  | A-11008    |
| CD3               | None            | Dako                      | A0452      |
| CD3               | FITC            | Biolegend                 | 344804     |
| CD4               | FITC            | BioLegend                 | 300506     |
| CD4               | FITC            | BioLegend                 | 357406     |
| CD8               | BV480           | BD Biosciences            | 566121     |
| CD14              | FITC            | BioLegend                 | 325604     |
| CCR7              | BV650           | Biolegend                 | 353234     |
| CD45              | PE-Cy7          | BioLegend                 | 368532     |
| CD45RA            | BV570           | Biolegend                 | 304132     |
| CD68              | None            | Thermo Fisher Scientific  | PA5-32331  |
| CD68              | None            | Cell Signaling Technology | 76437      |
| CD163             | None            | Thermo Fisher Scientific  | MA5-11458  |
| CD96              | None            | Thermo Fisher Scientific  | PA5-97568  |
| CD96              | None            | BioLegend                 | 338402     |
| CD96              | PE              | BioLegend                 | 338406     |
| CD96              | BV421           | Biolegend                 | 338418     |
| PD-1              | PE              | Biolegend                 | 329906     |
| TIGIT             | PE/Dazzle594    | Biolegend                 | 372716     |
| CD226             | BV711           | Biolegend                 | 338334     |
| TIM3              | PE/Cy5          | Biolegend                 | 345052     |
| LAG3              | PE/Cy7          | Thermo Fischer Scientific | 25-2239-42 |
| CD155             | None            | Thermo Fischer Scientific | MA5-13493  |
| CD155             | None            | BioLegend                 | 337502     |
| CD155             | None            | Thermo Fischer Scientific | MA5-29762  |
| CD155             | PE              | BioLegend                 | 337507     |
| CD63              | None            | Santa Cruz Biotechnology  | sc-5275    |
| GM130             | None            | abcam                     | ab52649    |
| ERGIC-53/p58      | None            | Sigma                     | E1031      |
| LAMP2A            | None            | abcam                     | ab18528    |
| Calnexin          | None            | Abclonal                  | A15631     |
| ee1               | None            | Abclonal                  | A0592      |
| LC3               | None            | MBL                       | PM036      |
| HSP60             | None            | Santa Cruz Biotechnology  | sc-13115   |
| GRP78             | None            | Thermo Fischer Scientific | PA1-014A   |
| IFN- $\gamma$     | PerCP/Cy5.5     | BioLegend                 | 502526     |
| IL-9              | None            | BioLegend                 | 507704     |
| IL-9              | None            | proteintech               | 66144-Ig   |
| IL-9              | BV421           | BD Bioscience             | 564254     |
